# Supplementary material for: Tomato fruit as a model for tissue-specific gene silencing in crop plants
Source: PubMed Central journal article supplement (PMC7459100; doi:10.1038/s41438-020-00363-4), 2020-09-01
Supplement: 41438_2020_363_MOESM7_ESM.pdf [file 41438_2020_363_MOESM7_ESM.pdf]

>cGFP sequence

AGTACTTTGATCCAACCCCTCCGCTGCTATAGTGCAGTCGGCTTCTGACGTTTCAGTGCAGCCGTCTTCTGAAAACGA  
CATGTGCGACAAGTCCTAAGTTACGCGACAGGCTGCCGCCCTGCCCTTTTCTGGCGTTTTCTTGTGCGGTGTTTTA  
GTCGCATAAAGTAGAATACTTGC GACTAGAACCGGAGACATTACGCCATGAACAAGAGCGCCCGCTGGCCTGC  
TGGGCTATGCCCGCGTCAGCACCGACGACCAGGACTTGACCAACCAACGGGCCGAAGTGCACGCGCCGGCTGC  
ACCAAGCTGTTTTCCGAGAAGATCACCGGCACCAGGCGCGACCGCCCGGAGCTGGCCAGGATGCTTGACCACCTA  
CGCCCTGGCGACGTTGTGACAGTGACCAGGCTAGACCGCCTGGCCCGCAGCACCCCGGACCTACTGGACATTGCC  
GAGCGCATCCAGGAGGCCGGCGCGGGCCTGCGTAGCCTGGCAGAGCCGTGGGCCGACACCACCACGCCGGCCG  
GCCGCATGGTGTGACCGTGTTCGCCGGCATTGCCGAGTTCGAGCGTTCCTAATCATCGACCGCACCCGGAGCG  
GGCGCGAGGCCGCAAGGCCCGAGGCGTGAAGTTTGGCCCCGCCCTACCCCTACCCCGGCACAGATCGCGCAC  
GCCCGCGAGCTGATCGACCAGGAAGGCCGCACCGTGAAGAGGCGGCTGCACTGCTTGGCGTGCATCGCTCGAC  
CCTGTACCGCGCACTTGAGCGCAGCGAGGAAGTGACGCCACCGAGGCCAGCGGGCGCGGTGCCTTCCGTGAGG  
ACGATTGACCGAGGCCGACGCCCTGGCGGCCGCCGAGAATGAACGCCAAGAGGAACAAGCATGAAACCGCACC  
AGGACGGCCAGGACGAACCGTTTTTTCATTACCGAAGAGATCGAGGCGGAGATGATCGCGGCCGGGTACGTGTTT  
GAGCCGCCCGCGCACGTCTCAACCGTGC GGTGCATGAAATCCTGGCCGTTTGTCTGATGCCAAGCTGGCGGCC  
TGGCCGGCCAGCTTGGCCGCTGAAGAAACCGAGCGCCGCCGTCTAAAAGGTGATGTGATTTGAGTAAAACAGC  
TTGCGTCATGCGGTGCTGCGTATATGATGCGATGAGTAAATAAACAATAACGCAAGGGGAACGCATGAAGGTTA  
TCGCTGTACTTAACCAGAAAGGCGGGTTCAGGCAAGACGACCATCGCAACCCATCTAGCCCGCGCCCTGCAACTCG  
CCGGGGCCGATGTTCTGTTAGTCGATTCCGATCCCCAGGGCAGTGCCCGGATTGGGCGGCCGTGCGGGAAGATC  
AACCGCTAACCGTTGTCGGCATCGACCGCCCGACGATTGACCGCGACGTGAAGGCCATCGGCCGGCGCGACTTCG  
TAGTGATCGACGGAGCGCCCCAGGCGGCGGACTTGGCTGTGTCCGCGATCAAGGCAGCCGACTTCGTGCTGATTC  
CGGTGCAGCCAAGCCCTTACGACATATGGGCCACCGCCGACCTGGTGGAGCTGGTTAAGCAGCGCATTGAGGTCA  
CGGATGGAAGGCTACAAGCGGCCCTTGTGCTGTCGCGGGCGATCAAAGGCACGCGCATCGGCGGTGAGGTTGCC  
GAGGCGCTGGCCGGGTACGAGCTGCCATTCTTGAGTCCCGTATCACGCAGCGCGTGAGCTACCCAGGCACTGCC  
GCCGCCGGCACAAACCGTTCTTGAATCAGAACCCGAGGGCGACGCTGCCCGGAGGTCCAGGCGCTGGCCGCTGA  
AATTAATCAAACTCATTTGAGTTAATGAGGTAAGAGAAAATGAGCAAAGCACAAACACGCTAAGTGCCGGC  
CGTCCGAGCGCACGCAGCAGCAAGGCTGCAACGTTGGCCAGCCTGGCAGACACGCCAGCCATGAAGCGGGTCAA  
CTTTCAGTTGCCGGCGGAGGATCACACCAAGCTGAAGATGTACGCGGTACGCCAAGGCAAGACCATTACCGAGCT  
GCTATCTGAATACATCGCGCAGCTACCAGAGTAAATGAGCAAATGAATAAATGAGTAGATGAATTTTAGCGGCTA  
AAGGAGGCGGCATGGAAAATCAAGAACAACCGAGGCCACCGACGCCGTGGAATGCCCCATGTGTGGAGGAACGGG  
CGGTTGGCCAGGCGTAAGCGGCTGGGTTGTCTGCCGGCCCTGCAATGGCACTGGAACCCCAAGCCCGAGGAAT  
CGGCGTGACGGTCGCAAACCATCCGGCCCCGTACAAATCGGCGCGGGCGCTGGGTGATGACCTGGTGGAGAAGTT  
GAAGGCCGCGCAGGCCGCCACGCGCAACGCATCGAGGCGAAGCACGCCCCGGTGAATCGTGGCAAGCGGCC  
GCTGATCGAATCCGCAAAGAATCCCGGCAACCGCCGGCAGCCGGTGCGCCGTCGATTAGGAAGCCGCCAAGGG  
CGACGAGCAACCAGATTTTTTTCGTTCCGATGCTCTATGACGTGGGCACCCCGGATAGTCGACGATCATGGACGTG  
GCCGTTTTCCGTCTGTGCAAGCGTGACCGACGAGCTGGCGAGGTGATCCGCTACGAGCTTCCAGACGGGCACGTA  
GAGGTTTTCCGAGGGCCGGCCGGCATGGCCAGTGTGTGGGATTACGACCTGGTACTGATGGCGTTTTCCCATCTA  
ACCGAATCCATGAACCGATACCGGGAAGGGAAGGGAGACAAGCCCGGCCGCGTGTCCGTCCACACGTTGCGGA  
CGTACTCAAGTTCTGCCGGCGAGCCGATGGCGGAAAGCAGAAAGACGACCTGGTAGAAACCTGCATTCCGGTTAAA  
CACCACGCACGTTGCCATGCAGCGTACGAAGAAGGCCAAGAACCGGCCGCTGGTGACGGTATCCGAGGGTGAAG  
CCTTGATTAGCCGCTACAAGATCGTAAAGAGCGAAACCGGGCGGGCCGAGTACATCGAGATCGAGCTAGCTGATT  
GGATGTACCGCGAGATCACAGAAGGCAAGAACCCGGACGTGCTGACGGTTCACCCCGATTACTTTTTGATCGATC

CCGGCATCGGCCGTTTTCTCTACCGCCTGGCACGCCGCGCCGCAGGCAAGGCAGAAGCCAGATGGTTGTTCAAGA  
CGATCTACGAACGCAGTGGCAGCGCCGGAGAGTTCAAGAAGTTCTGTTTACCCTGCGCAAGCTGATCGGGTCAA  
ATGACCTGCCGGAGTACGATTTGAAGGAGGAGGCGGGGCAGGCTGGCCCGATCCTAGTCATGCGCTACCGCAAC  
CTGATCGAGGGCGAAGCATCCGCCGTTTCTAATGTACGGAGCAGATGCTAGGGCAAATTGCCCTAGCAGGGGA  
AAAAGTTCGAAAAGGTCTCTTTCTGTGGATAGCACGTACATTGGGAACCCAAAGCCGTACATTGGGAACCGGAA  
CCCGTACATTGGGAACCCAAAGCCGTACATTGGGAACCGGTACACATGTAAGTGACTGATATAAAAGAGAAAAA  
AGGCGATTTTTCCGCCTAAAACCTTTAAAACCTTATAAAACCTTAAAACCCGCCTGGCCTGTGCATAACTGTCTG  
GCCAGCGCACAGCCGAAGAGCTGCAAAAAGCGCCTACCCTTCGGTTCGCTGCGCTCCCTACGCCCCGCGCTTCGC  
GTCGGCCTATCGCGGCCGCTGGCCGCTCAAAAATGGCTGGCCTACGGCCAGGCAATCTACCAGGGCGCGGACAA  
GCCGCGCCGTCGCCACTCGACCGCCGGCGCCACATCAAGGCACCCTGCCTGCGCGTTTCGGTGATGACGGTGA  
AAACCTCTGACACATGCAGCTCCCGGAGACGGTACAGCTTGTCTGTAAGCGGATGCCGGGAGCAGACAAGCCCG  
TCAGGGCGCGTCAGCGGGTGTGGCGGGTGTGGGGCGCAGCCATGACCCAGTCACGTAGCGATAGCGGAGTGT  
ATACTGGCTTAACTATGCGGCATCAGAGCAGATTGTAAGAGTGCACCATATGCGGTGTGAAATACCGCACAG  
ATGCGTAAGGAGAAAATACCGCATCAGGCGCTCTTCCGCTTCTCGCTCACTGACTCGCTGCGCTCGGTTCGGTTCGG  
CTGCGGCGAGCGGTATCAGCTCACTCAAAGGCGGTAATACGGTTATCCACAGAATCAGGGGATAACGCAGGAAA  
GAACATGTGAGCAAAGGCCAGCAAAGGCCAGGAACCGTAAAAGGCCGCGTTGCTGGCGTTTTTCCATAGGC  
TCCGCCCCCTGACGAGCATCACAAAATCGACGCTCAAGTCAGAGGTGGCGAAACCCGACAGGACTATAAAGAT  
ACCAGGCGTTTTCCCTGGAAGCTCCCTCGTGCCTCTCTGTTCCGACCCTGCCGTTACCGGATACCTGTCCGCC  
TTTTCTCCCTTCGGGAAGCGTGGCGTTTTCTCATAGCTCACGCTGTAGGTATCTCAGTTCGGTGTAGGTTCGCTC  
CAAGCTGGGCTGTGTGCACGAACCCCGTTCAGCCCGACCGCTGCGCCTTATCCGGTAACTATCGTCTTGAGTCC  
AACCCGTAAGACACGACTTATCGCCACTGGCAGCAGCCACTGGTAAACAGGATTAGCAGAGCGAGGTATGTAGG  
CGGTGCTACAGAGTTCTTGAAGTGGTGGCCTAACTACGGCTACACTAGAAGGACAGTATTTGGTATCTGCGCTCTG  
CTGAAGCCAGTTACCTTCGGAAAAGAGTTGGTAGCTCTTGATCCGGCAAACAAACCACCGCTGGTAGCGGTGGT  
TTTTTTGTTTGAAGCAGCAGATTACGCGCAGAAAAAAGGATCTCAAGAAGATCCTTTGATCTTTTCTACGGGGT  
CTGACGCTCAGTGAACGAAAACCTCACGTTAAGGGATTTTGGTCATGCAGGATCATGAATTAATTCTTAGAAAAAC  
TCATCGAGCATCAAATGAAACTGCAATTTATTCATATCAGGATTATCAATACCATATTTTTGAAAAGCCGTTTTCTG  
TAATGAAGGAGAAAACCTCACCGAGGCAGTTCATAGGATGGCAAGATCCTGGTATCGGTTCGCGATTCCGACTCG  
TCCAACATCAATACAACCTATTAATTTCCCTCGTCAAAAATAAGGTTATCAAGTGAGAAATCACCATGAGTGACGA  
CTGAATCCGGTGAGAATGGCAAAGTTTATGCATTTCTTCCAGACTTGTCAACAGGCCAGCCATTACGCTCGTCA  
TCAAATCACTCGCATCAACCAAACCGTTATTCATTCGTGATTGCGCCTGAGCGAGACGAAATACGCGATCGCTGT  
TAAAAGGACAATTACAAACAGGAATCGAATGCAACCGGCGCAGGAACACTGCCAGCGCATCAACAATATTTTAC  
CTGAATCAGGATATTCTTCTAATACCTGGAATGCTGTTTTCCCGGGGATCGCAGTGGTGAGTAACCATGCATCATC  
AGGAGTACGGATAAAATGCTTGATGGTTCGGAAGAGGCATAAATCCGTCAGCCAGTTTATGCTGACCATCTCATCT  
GTAACATCATTGGCAACGCTACCTTTGCCATGTTTCAAGAAACAACTCTGGCGCATCGGGCTTCCCATACAATCGATA  
GATTGTCGCACCTGATTGCCCGACATTATCGCGAGCCATTTATACCCATATAAATCAGCATCCATGTTGGAATTTA  
ATCGCGCCTAGAGCAAGACGTTTCCCGTTGAATATGGCTCATAACACCCCTTGTATTACTGTTTATGTAAGCAGAC  
AGTTTTATTGTTTCATGATCTGGATCACAGGCAGCAACGCTCTGTCATCGTTACAATCAACATGCTACCCTCCGCGAG  
ATCATCCGTGTTTCAAACCCGGCAGCTTAGTTGCCGTTCTTCCGAATAGCATCGGTAACATGAGCAAAGTCTGCCG  
CCTTACAACGCTCTCCCGTACGCGCTCCCGACTGATGGGCTGCCTGTATCGAGTGGTGATTTTGTGCCGAGC  
TGCCGGTCCGGGAGCTGTTGGCTGGCTGGTGGCAGGATATATTGTGGTGTAAACAAATTGACGCTTAGACAATT  
AATAACACATTGCGGACGTTTTTAAATGTAAGTGAATTAACGCCGAATTGCTCTAGCCAATACGCAAACCGCCTCTCCC  
CGCGCGTTGGCCGATTCAATTAATGCAGCTGGCACGACAGGTTTCCCGACTGGAAAGCGGGCAGTGAGCGCAACG  
CAATTAATGTGAGTTAGCTCACTCATTAGGCACCCCAAGGTTTACACTTATGCTTCCGGCTCGTATGTTGTGTGGA  
ATTGTGAGCGGATAACAATTCACACAGGAAACAGCTATGACATGATTACGAATTCCTTGACTAGAGGGTAGGCG



GACTGTAAC TAAAATACTTAATGTAAGAAGAATATTACTCCTTTAATAGCTTTTGAGTATATCTAGTCTAACATCTTT  
TAAAAAAGTCTAATTTCTTTTCATTTATTTTTCGAGCAATAGCAAAGTGCATAATTATTTTTTTCTTCTAGAAATTCAG  
ATTTGTTTCTCTAAAATTTGAGATTCCTTTCTCAATTTGTATGTCTAGAGAACAATGTGTATTTTCACTCTAGTTGG  
TTGTTACTTTGTTGAATGTTCTGATAAAAAGTATATTGTTATTTCTGAAGTAGATATAAACCTTCATTTGGAATTTATA  
CATAAATCAAATCGTTAATTATCTAGATCAAGATATATGCCCTTTTCTAATGTATTTGATACATGCACCTAATTTTC  
ACTAGATGTATCTTTTCTATTTTTAAATTATGAATAGTTAATTTTTCCATATGTGTATTTGATACATACTTCATGAC  
TTAAAAAATTAATTATATACCAGATATATGTATTTAAAATTTGTTATGTATTTAAAGTATGTATATGATTATTCGAT  
ATTAATCTCTTCGATGAAATTTCAATTGCGATAACTATGTGCTTTGGATCGATCTGCCCTAGGATACATTCTACTTTG  
AAGTTGTTAATGAGGTAATAGGACACCTGCAAAGTTAAAATATCTTTTTAAAAATTGAAAACAACCTTCGATGATAT  
TTTTATGTCTTTTCTCTGTAACAAAATATATACATGCTTCTAATTTGGTGTTTTATGACTATTGCACACTCGACCT  
TCCACGTGTTTGTGCTTACTTGAACACGTATCATCCATCTATTTTTGTCTATACATTAATAAAAATTATTCAAAAT  
AGAGACACGTCATCTATAAATTATTGTTGGAGTTATGTCACTTTGTGCTTTAATTAGACGTGTTTTTCTATATTGATT  
TTCTTAATGATTTGGCAATGTTATGCTCAGAAAAGAAACCAATAATGAATATGGGGTATATAGAATTGTCATTA  
CGAATATCATAATATAAAGAAGTAAATAAACATAAGAGAAAATTAATGAGATTTTACTATCTATACATAAAAAAT  
AAGTTTAATATGAATGAATAATGCAATTTCTCATTGAACGGATAATTTAATCTTTAATTCTACATAGCTCCTCCCCT  
CCCTAAAGCAACAATTAAGATGAATTATGATGAAATGATAGAGATCTCGACATTTAAAGATTTCAAATTTAAATTT  
AAAAATGATTATGATAATTAAGATAATTTGAGATATCGATAATATCCATGTAGAGACGGCTCTACGGAATAACG  
TAAAGGATAAGTTATGAGTTCATTTAGATTTAATATTTCAATTCAGATTAATTAATGAATAAGAATTTAATTGAAT  
AAGCGCAAGTATTTAGGGTGGGTTTACTATTTAGTTAGAAAATTTCTCCTTACACTTTTTCATATTGATATATTCACA  
TTTTGAATTGCTCTCAATTCATGTTTATTCTCTGAGTAAATGCGTGAAACTAGTAAAATTTATATTTTTAAT  
CGAATAAGTGCAAGTATTTAGAGTGGGCTTATTATTTAGTTAGAAAATTTCTCCTCACACATCTCATATCGATATA  
TTCACATTTTTGATACGTTTCATCAATTTATGTTTACTATTCTTTTGTAGTAAATGCGTGAAACAGTAAAATTTATA  
TCGATTCATAGATTTAATCCATCATTTACTTTTTATTTATCTATTATATTAATAAATGAATTTAATAACCTTAGTGCTT  
ACAAATTTCAAATTTTTCCAAATTAATTAAGATTATAGGCTAAGTACGTGATAATGAGTTATTAATATG  
CACGTCATCAATTTTTCTTACTTATAATTATTTATTTTAAATTTTTTAAATTTTTATCTTAAATATT  
AATTTATTATGATAATATATGTACGTCCATTTTTTTTTAAAGAATCATTCAAAGTTTAAATCAGATAACTAAGATTGA  
ATAGAAAATATTTATCGAGAACTAAAAATACGCGGGTGAATAAATAAAAAATGAAAGAAATAAATTTAATAAAGC  
CATCTATATATAATAACATACCATGAAATGACAAAGTGACAAAGTAGAGTGTAAGAGCTTATTATATAGTGAACA  
ATTCTCTTTTTAGATCACAAATCCCTTGAACCAACAAAGCAAAAACCAATCATTTTTCTAAGTAAAAA  
AACCTGATTTTTGTTTCTTACTGGAAAAAGCTTCTTTTTTCTTTCTTCATCATCTGGGTTCTAAAATAAATCAA  
GATTCAGGTACCCCATTTATAATACTCTTTTTTTCATTGCCATACGCTAAAAATTTGATCTTTTTTCTGTTTCAT  
GTGGACCTTTAAATCCCTTTTTTAAAAAATATTCTGTTTTGATGGGGTAATTTGATTAATAAATTTATGATGATC  
TTTCTGTTGTGCCCACTATTTATTTATTTTTTAAAAATAATTTTTTGCAGGATTTTGAATTTGTAGTTGAGTAAAA  
AGGGGGTTAGGCCTGCTAGCATGGACAAGAAGTACTCCATTGGGCTCGATATCGGCACAAACAGCGTCGGCTGG  
GCCGTCATTACGGACGAGTACAAGGTGCCGAGCAAAAATTCAAAGTTCTGGGCAATACCGATCGCCACAGCATA  
AAGAAGAACCTCATTGGCGCCCTCCTGTTGACTCCGGGGAGACGGCCGAAGCCACGCGGCTCAAAGAACAGC  
ACGGCGCAGATATACCCGAGAAAGAATCGGATCTGCTACCTGCAGGAGATCTTTAGTAATGAGATGGCTAAGGT  
GGATGACTCTTTCTTCATAGGCTGGAGGAGTCTTTTTGGTGGAGGAGGATAAAAAGCACGAGCGCCACCCAAT  
CTTTGGCAATATCGTGACGAGGTGGCGTACCATGAAAAGTACCAACCATATATCATCTGAGGAAGAAGCTTGT  
AGACAGTACTGATAAGGCTGACTTGCAGTTGATCTATCTCGCGCTGGCGCATATGATCAAATTTGCGGGACACTTC  
CTCATCGAGGGGGACCTGAACCCAGACAACAGCGATGTCGACAACTCTTTATCCAATGGTTTCAGACTTACAATC  
AGTTTTCGAAGAGAACCCGATCAACGCATCCGGAGTTGACGCCAAAGCAATCCTGAGCGCTAGGCTGTCCAAT  
CCCGGGGCTCGAAAACCTCATCGCACAGCTCCCTGGGGAGAAGAAGAACGGCTGTTTGGTAATCTTATCGCCC  
TGCTACTCGGGCTGACCCCAACTTTAAATCTAATCTGACCTGGCCGAAGATGCCAAGCTTCACTGAGCAAAGA

CACCTACGATGATGATCTCGACAATCTGCTGGCCCAGATCGGCCAGCAGTACGCAGACCTTTTTTGGCGGCAAAG  
AACCTGTCAGACGCCATTCTGCTGAGTGATATTCTGCGAGTGAACACGGAGATCACCAAAGCTCCGCTGAGCGCT  
AGTATGATCAAGCGCTATGATGAGCACCACCAAGACTTGACTTTGCTGAAGGCCCTTGTCAGACAGCAACTGCCTG  
AGAAGTACAAGGAAATTTCTTCGATCAGTCTAAAAATGGCTACGCCGATACATTGACGGCGGAGCAAGCCAGG  
AGGAATTTTACAAATTTATTAAGCCCATCTTGAAAAAATGGACGGCACCGAGGAGCTGCTGGTAAAGCTTAACA  
GAGAAGATCTGTTGCGCAAACAGCGCACTTTGACAATGGAAGCATCCCCACCAGATTCACCTGGGCGAACTGC  
ACGCTATCCTCAGGCGGCAAGAGGATTTTACCCCTTTTTGAAAGATAACAGGGAAAAGATTGAGAAAATCCTCAC  
ATTTGCGATACCCTACTATGTAGGCCCTCGCCGGGAAATTCAGATTCGCGTGGATGACTCGCAAATCAGAA  
GAGACCATCACTCCCTGGAACCTTCGAGGAAGTCGTGGATAAGGGGGCCTCTGCCAGTCTTCATCGAAAGGATG  
ACTAATTTGATAAAAATCTGCCTAACGAAAAGGTGCTTCCTAAACACTCTCTGCTGTACGAGTACTTCACAGTTA  
TAACGAGCTACCAAGGTCAAATACGTCACAGAAGGGATGAGAAAGCCAGCATTCTGTCTGGAGAGCAGAAGA  
AAGCTATCGTGGACCTCCTCTTCAAGACGAACCGGAAAGTTACCGTGAAACAGCTCAAAGAAGACTATTTCAAAA  
GATTGAATGTTTCGACTCTGTTGAAATCAGCGGAGTGGAGGATCGTTCAACGCATCCCTGGGAACGTATCACGAT  
CTCCTGAAAATCATTAAAGACAAGGACTTCCTGGACAATGAGGAGAACGAGGACATTCTTGAGGACATTGTCCTC  
ACCCTTACGTTGTTGAAGATAGGGAGATGATTGAAGAACGCTTGAAAACCTACGCTCATCTTCGACGACAAAAG  
TCATGAAACAGCTCAAGAGGCGCCGATATACAGGATGGGGGCGGCTGTCAAGAAAAGTATCAATGGGATCCGA  
GACAAGCAGAGTGGAAAGACAATCCTGGATTTCTTAAGTCCGATGGATTTGCCAACCGGAACCTTCATGCAGTTG  
ATCCATGATGACTCTCTACCTTAAGGAGGACATCCAGAAAGCACAAGTTTCTGGCCAGGGGGACAGTCTTCACG  
AGCACATCGCTAATCTTGCAAGTAGCCAGCTATCAAAAAGGGAATACTGCAGACCGTTAAGGTCGTGGATGAAC  
TCGTCAAAGTAATGGGAAGGCATAAGCCCGAGAATATCGTTATCGAGATGGCCCGAGAGAACCAAACCTACCCAGA  
AGGGACAGAAGAACAGTAGGGAAAGGATGAAGAGGATTGAAGAGGGTATAAAAAGAACTGGGGTCCCAAATCCT  
TAAGGAACACCCAGTTGAAAACACCCAGCTTCAGAATGAGAAGCTCTACCTGTACTACCTGCAGAACGGCAGGGA  
CATGTACGTGGATCAGGAACTGGACATCAATCGGCTCTCCGACTACGACGTGGATCATATCGTGCCCAAGTCTTT  
CTCAAAGATGATTCTATTGATAATAAAGTGTGACAAGATCCGATAAAAATAGAGGGAAGAGTGATAACGTCCCC  
TCAGAAGAAGTTGTCAAGAAAATGAAAATTATTGGCGCAGCTGCTGAACGCCAACTGATCACACAACGGAAG  
TTCGATAATCTGACTAAGGCTGAACGAGGTGGCCTGTCTGAGTTGGATAAAGCCGGCTTCATCAAAGGCAGCTT  
GTTGAGACACGCCAGATCACCAAGCACGTGGCCAAATCTCGATTACGCATGAACACCAAGTACGATGAAAAT  
GACAACTGATTGAGAGGTGAAAGTTACTCTGAAGTCTAAGCTGGTCTCAGATTTAGAAAGGACTTTCAGT  
TTTATAAGGTGAGAGAGATCAACAATTACCACCATGCGCATGATGCCTACCTGAATGCAGTGGTAGGCACTGCACT  
TATCAAAAATATCCCAAGCTTGAATCTGAATTTGTTTACGGAGACTATAAAGTGTACGATGTTAGGAAAATGATC  
GCAAAGTCTGAGCAGGAAATAGGCAAGGCCACCGCTAAGTACTTCTTTTACAGCAATATTATGAATTTTTTCAAGA  
CCGAGATTACACTGGCCAATGGAGAGATTCGGAAGCGACCACTTATCGAAACAAACGGAGAAACAGGAGAAATC  
GTGTGGGACAAGGGTAGGGATTCGCGACAGTCCGGAAGGTCCTGTCCATGCCGAGGTGAACATCGTTAAAAA  
GACCGAAGTACAGACCGGAGGCTTCTCAAGGAAAGTATCCTCCGAAAAGGAACAGCGACAAGCTGATCGCAC  
GCAAAAAAGATTGGGACCCCAAGAAATACGGCGGATTGATTCTCTACAGTCGCTTACAGTGTACTGGTTGTGG  
CCAAAGTGGAGAAAGGGAAGTCTAAAAACTCAAAGCGTCAAGGAACTGCTGGGCATCACAATCATGGAGCGA  
TCAAGCTTCGAAAAAACCCATCGACTTTCTCGAGGCCGAAAGGATATAAAGAGGTCAAAAAGACCTCATCATT  
AGCTTCCCAAGTACTCTCTTTGAGCTTAAAACGGCCGAAACGAATGCTCGCTAGTGGCGGCGAGCTGCAGA  
AAGGTAACGAGCTGGCACTGCCCTCTAATACGTTAATTTCTTGATCTGGCCAGCCACTATGAAAAGCTCAAAGG  
GTCTCCCGAAGATAATGAGCAGAAGCAGCTGTTCTGTGGAACAACAAACACTACCTTGATGAGATCATCGAGCA  
AATAAGCGAATTCTCCAAAAGAGTGATCCTCGCCGACGCTAACCTCGATAAGGTGCTTTCTGCTTACAATAAGCAC  
AGGGATAAGCCATCAGGGAGCAGGCAGAAAACATTATCCACTTGTTTACTCTGACCAACTGGGCGCGCCTGCA  
GCCTTCAAGTACTTCGACACCACCATAGACAGAAAGCGGTACACCTCTACAAAGGAGGTCTGGACGCCACACTG  
ATTCATCAGTCAATTACGGGGCTCTATGAAACAAGAATCGACCTCTCTCAGCTCGGTGGAGACAGCAGGGCTGAC

CCCAAGAAGAAGAGGAAGGTGTGACCGCGGATATCTGCAGAAGCTTACGCGTCGACGTCTCGAGGCCGGCCGAG  
CTCGAATTTCCCGATCGTTCAAACATTTGGCAATAAAGTTTCTTAAGATTGAATCCTGTTGCCGGTCTTGCGATGA  
TTATCATATAATTTCTGTTGAATTACGTTAAGCATGTAATAATTAACATGTAATGCATGACGTTATTTATGAGATGG  
GTTTTATGATTAGAGTCCCGCAATTATACATTTAATACGCGATAGAAAACAAAATATAGCGCGCAAACCTAGGATA  
AATTATCGCGCGCGGTGTCATCTATGTTACTAGATCGGGAATTGATATCGTAGGGATAACAGGGTAATAAGCTTG  
GCACTGGCCGTCGTTTTACAACGTCGTGACTGGGAAAACCCTGGCGTTACCCAACCTAATCGCCTTGACGCACATC  
CCCCTTTCGCCAGCTGGCGTAATAGCGAAGAGGCCCGCACCGATCGCCCTTCCAACAGTTGCGCAGCCTGAATG  
GCGAATGAGCTTGAGCTTGATCAGATTGTCGTTTCCCGCCTTCAGTTTAAACTATCAGTGTGACAGGATATATT  
GGCGGGTAAACCTAAGAGAAAAGAGCGTTTATTAGAATAACGGATATTTAAAAGGGCGTGAAAAGGTTTATCCGT  
TCGTCCATTTGTATGTGCATGCCAACCACAGGGTCCCCTCGGGATCAA
