# Supplementary material for: Tomato fruit as a model for tissue-specific gene silencing in crop plants
Source: PubMed Central journal article supplement (PMC7459100; doi:10.1038/s41438-020-00363-4), 2020-09-01
Supplement: 41438_2020_363_MOESM8_ESM.pdf [file 41438_2020_363_MOESM8_ESM.pdf]

**Supplemental table 1: Oligo sequences**

| name             | sequence                                                                                 |
|------------------|------------------------------------------------------------------------------------------|
| GFP-F            | GGTAGGCGCGGCTTAATTAAGAATTCTCATGTTTGACAGCTTATC                                            |
| GFP-R            | GTACGGCGCGGCTTAATTAATGAAGCGGGAAACGAC                                                     |
| PPC-F            | TAATCTCTTCGATGAAATTTCAATTGCGATAACTATGTGCTTTGGATCGATCTGCCCTAGGATACATTCTACTTTGAAGTTGTTAATG |
| PPC-R            | TTGTCCATGCTAGCAGGCCTAACCCCTTTTACTCAAACCTA                                                |
| CasFrag-F        | AGGCCTGCTAGCATGGACAAGAAGTACTCC                                                           |
| CasFrag-R        | ATCATAGCGCTTGATCATACTAGCGCTCAGC                                                          |
| MfeI-MtU6-F      | GATATTAATCTCTTCGATGAAATTTTCATGCCTATCTTATATGATCAATGAGG                                    |
| MtU6-R           | AAGCCTACTGGTTCGCTTGAAG                                                                   |
| scaffold-F       | GTTTTAGAGCTAGAAATAGCAAGTT                                                                |
| AvrII-Scaffold-R | CATTAAACAACCTCAAAGTAGAATGTATCAAAAAAGCACCGACTCGGTG                                        |
| UNS1_Scaffold-R  | GAGAAATGGATGCGAGTAATGAAAAAAGCACCGACTCGGTG                                                |
| UNS1_MtU6-F      | CATTACTCGCATCCATTCTCATGCCTATCTTATATGATCAATGAGG                                           |
| GFPg1            | TCAAGCGAACCAGTAGGCTTGCTGAAGCACTGCACGCCGTGTTTTAGAGCTAGAAATAGC                             |
| GFPg2            | TCAAGCGAACCAGTAGGCTTGGGCGAGGAGCTGTTACCGGTTTTAGAGCTAGAAATAGC                              |
| SIEZ2g1          | TCAAGCGAACCAGTAGGCTTGGCGTCGGATAACTCCCTGTGTTTTAGAGCTAGAAATAGC                             |
| SIEZ2g2          | TCAAGCGAACCAGTAGGCTTgCAGGGCTCCATATCTGCATGTTTTAGAGCTAGAAATAGC                             |
| GFPseq-F         | GCTCCTGGACGTAGCCTTC                                                                      |
| GFPseq-R         | GGAGAGGACAGGCTTCTTGA                                                                     |
| SIEZ2seq-F1      | CCGTCAAATCCGATTCTTA                                                                      |
| SIEZ2seq-R1      | CAGTGTAACATTGGAAAAACAATCA                                                                |
| SIEZ2seq-F2      | GGTCTCCGACAGATGTTCA                                                                      |
| SIEZ2seq-R2      | AAGCAGGACGCTGAATTGAT                                                                     |

**Supplemental table 2: average seed weight in cGFP and gSIEZ2 fruit**

|        |            | seed no. | no. of fruits | total dry seed weight (gr) | avg seed weight (mg) |
|--------|------------|----------|---------------|----------------------------|----------------------|
| cGFP   | cGFP-i     | 131      | 3             | 0.3782                     | 2.887                |
|        | cGFP-ii    | 69       | 3             | 0.1943                     | 2.816                |
|        | cGFP-iii   | 100      | 3             | 0.3086                     | 3.086                |
| gSIEZ2 | gSIEZ2-i   | 109      | 2             | 0.3125                     | 2.867                |
|        | gSIEZ2-ii  | 34       | 1             | 0.103                      | 3.029                |
|        | gSIEZ2-iii | 99       | 3             | 0.29                       | 2.929                |
